# Supplementary material
Source: Royal Society of Chemistry journal article supplement (doi:10.1039/d6nr00413j)

Wind speed  $\approx 6\text{m/s}$   
Tilt angle variation :  $15^\circ \rightarrow 37^\circ \rightarrow 25^\circ$

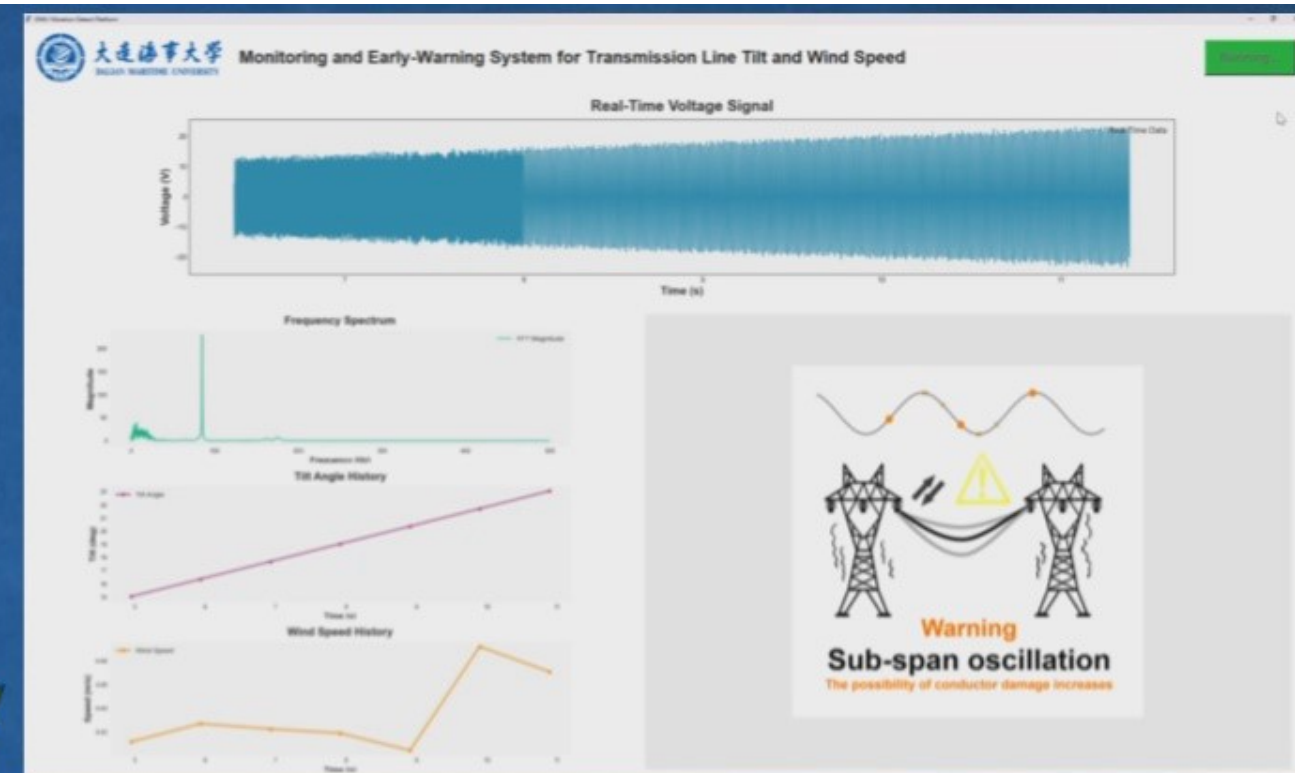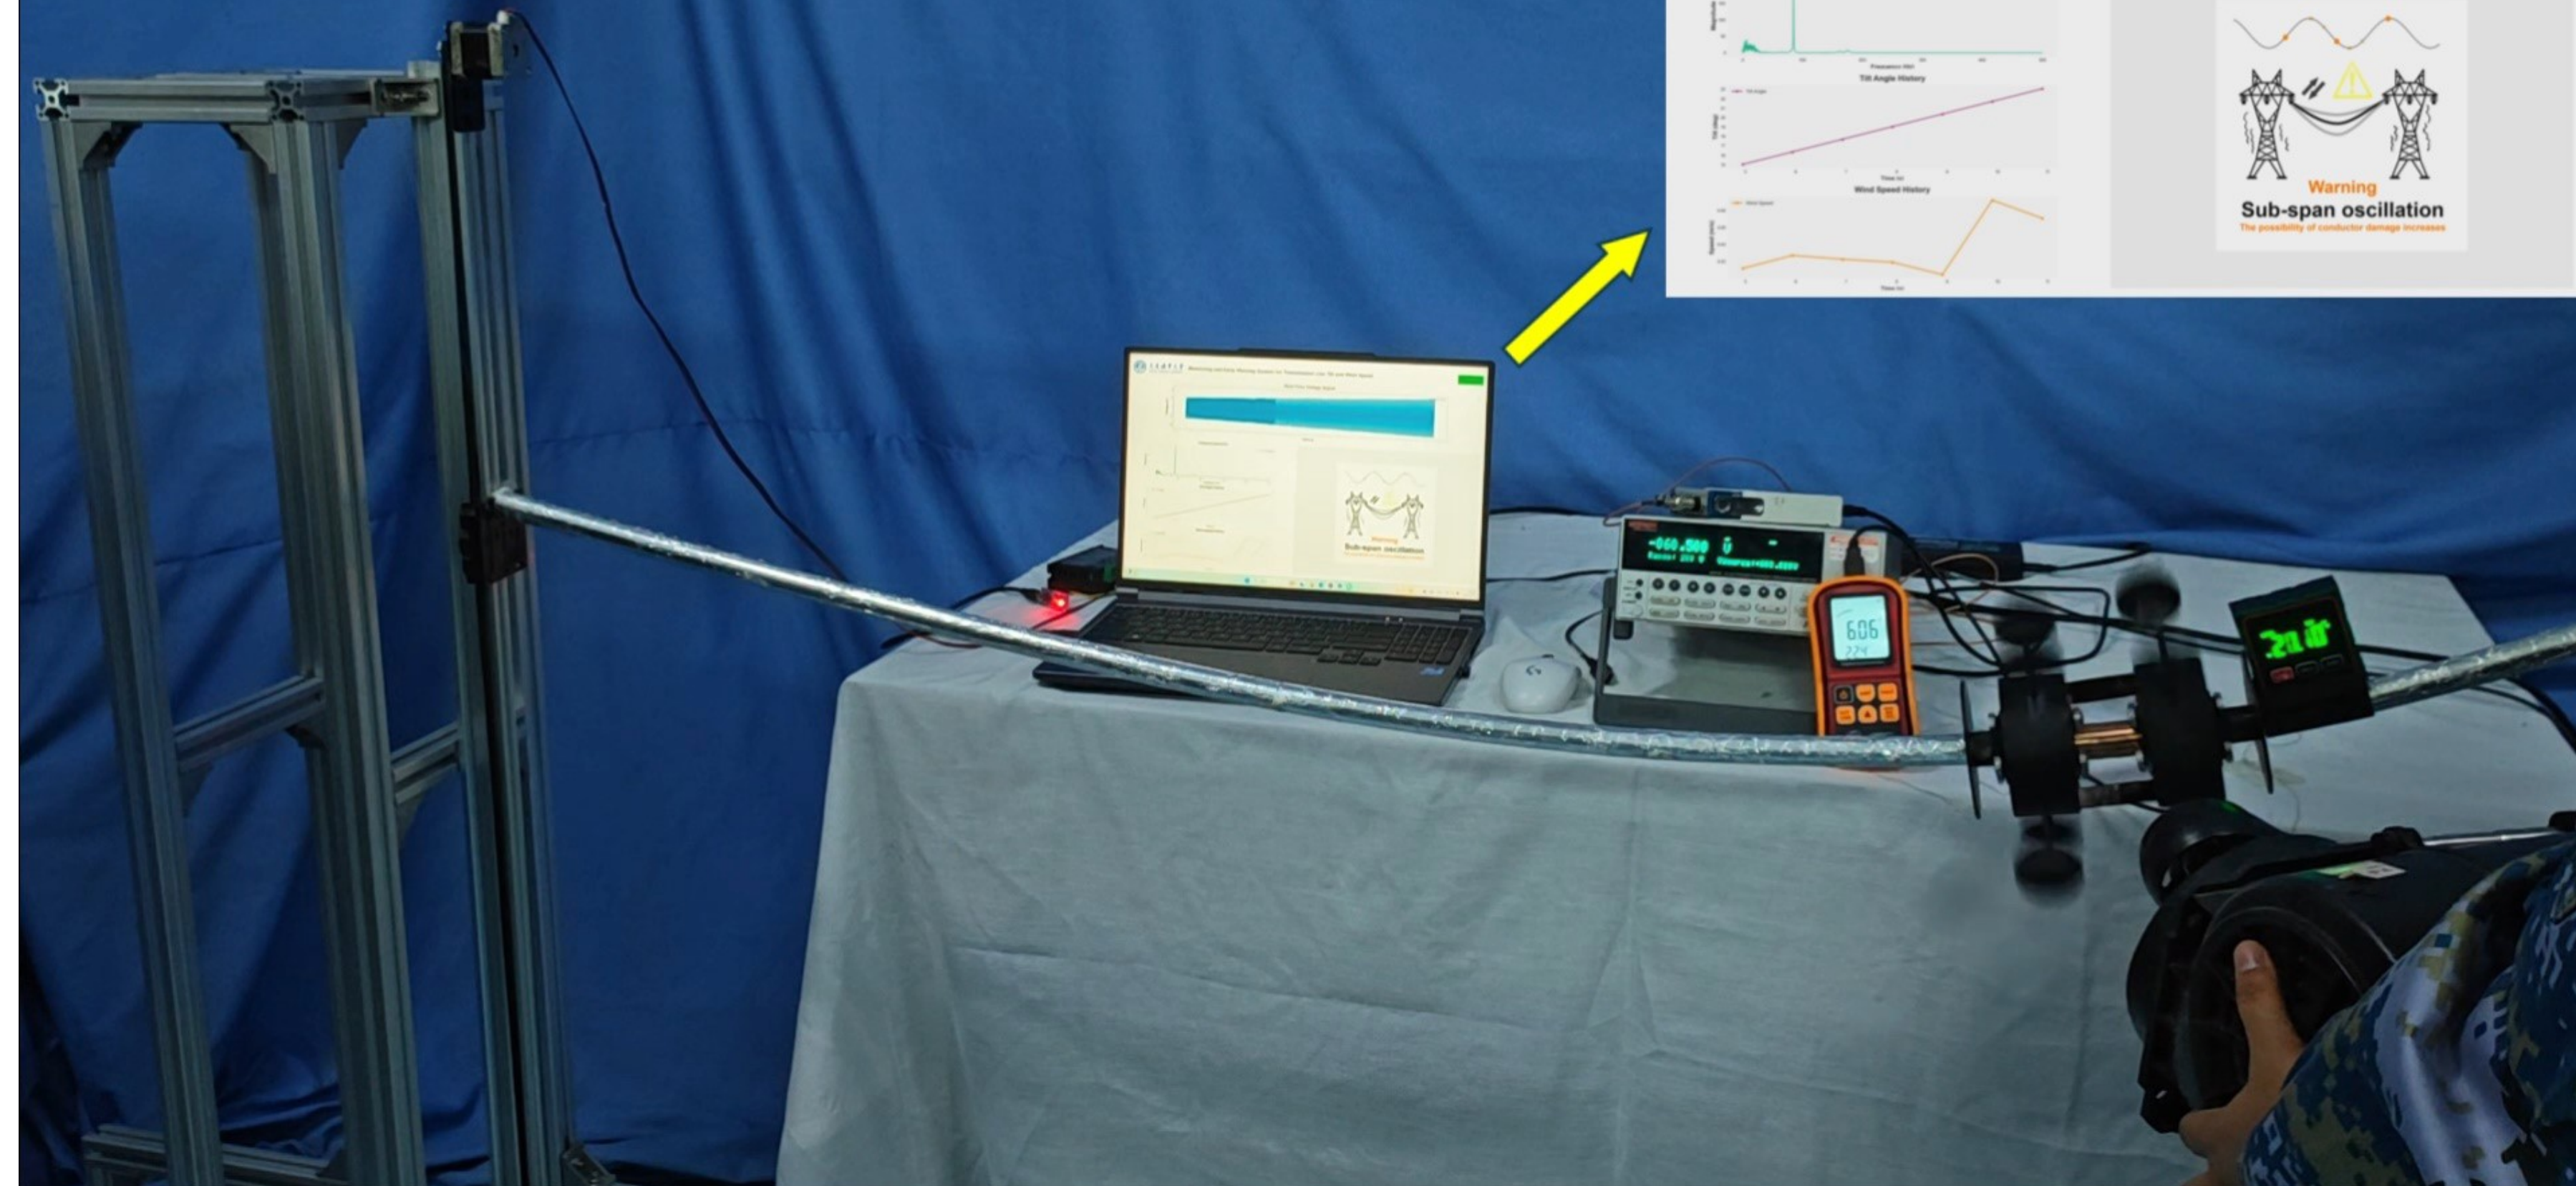

Supplement: d6nr00413j3.pdf [file d6nr00413j3.pdf]

Wind Speed=5m/s  
Tilt Angle=35°

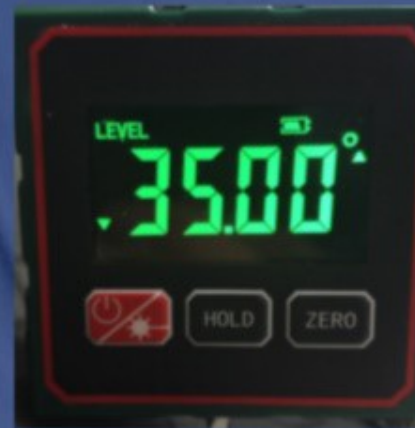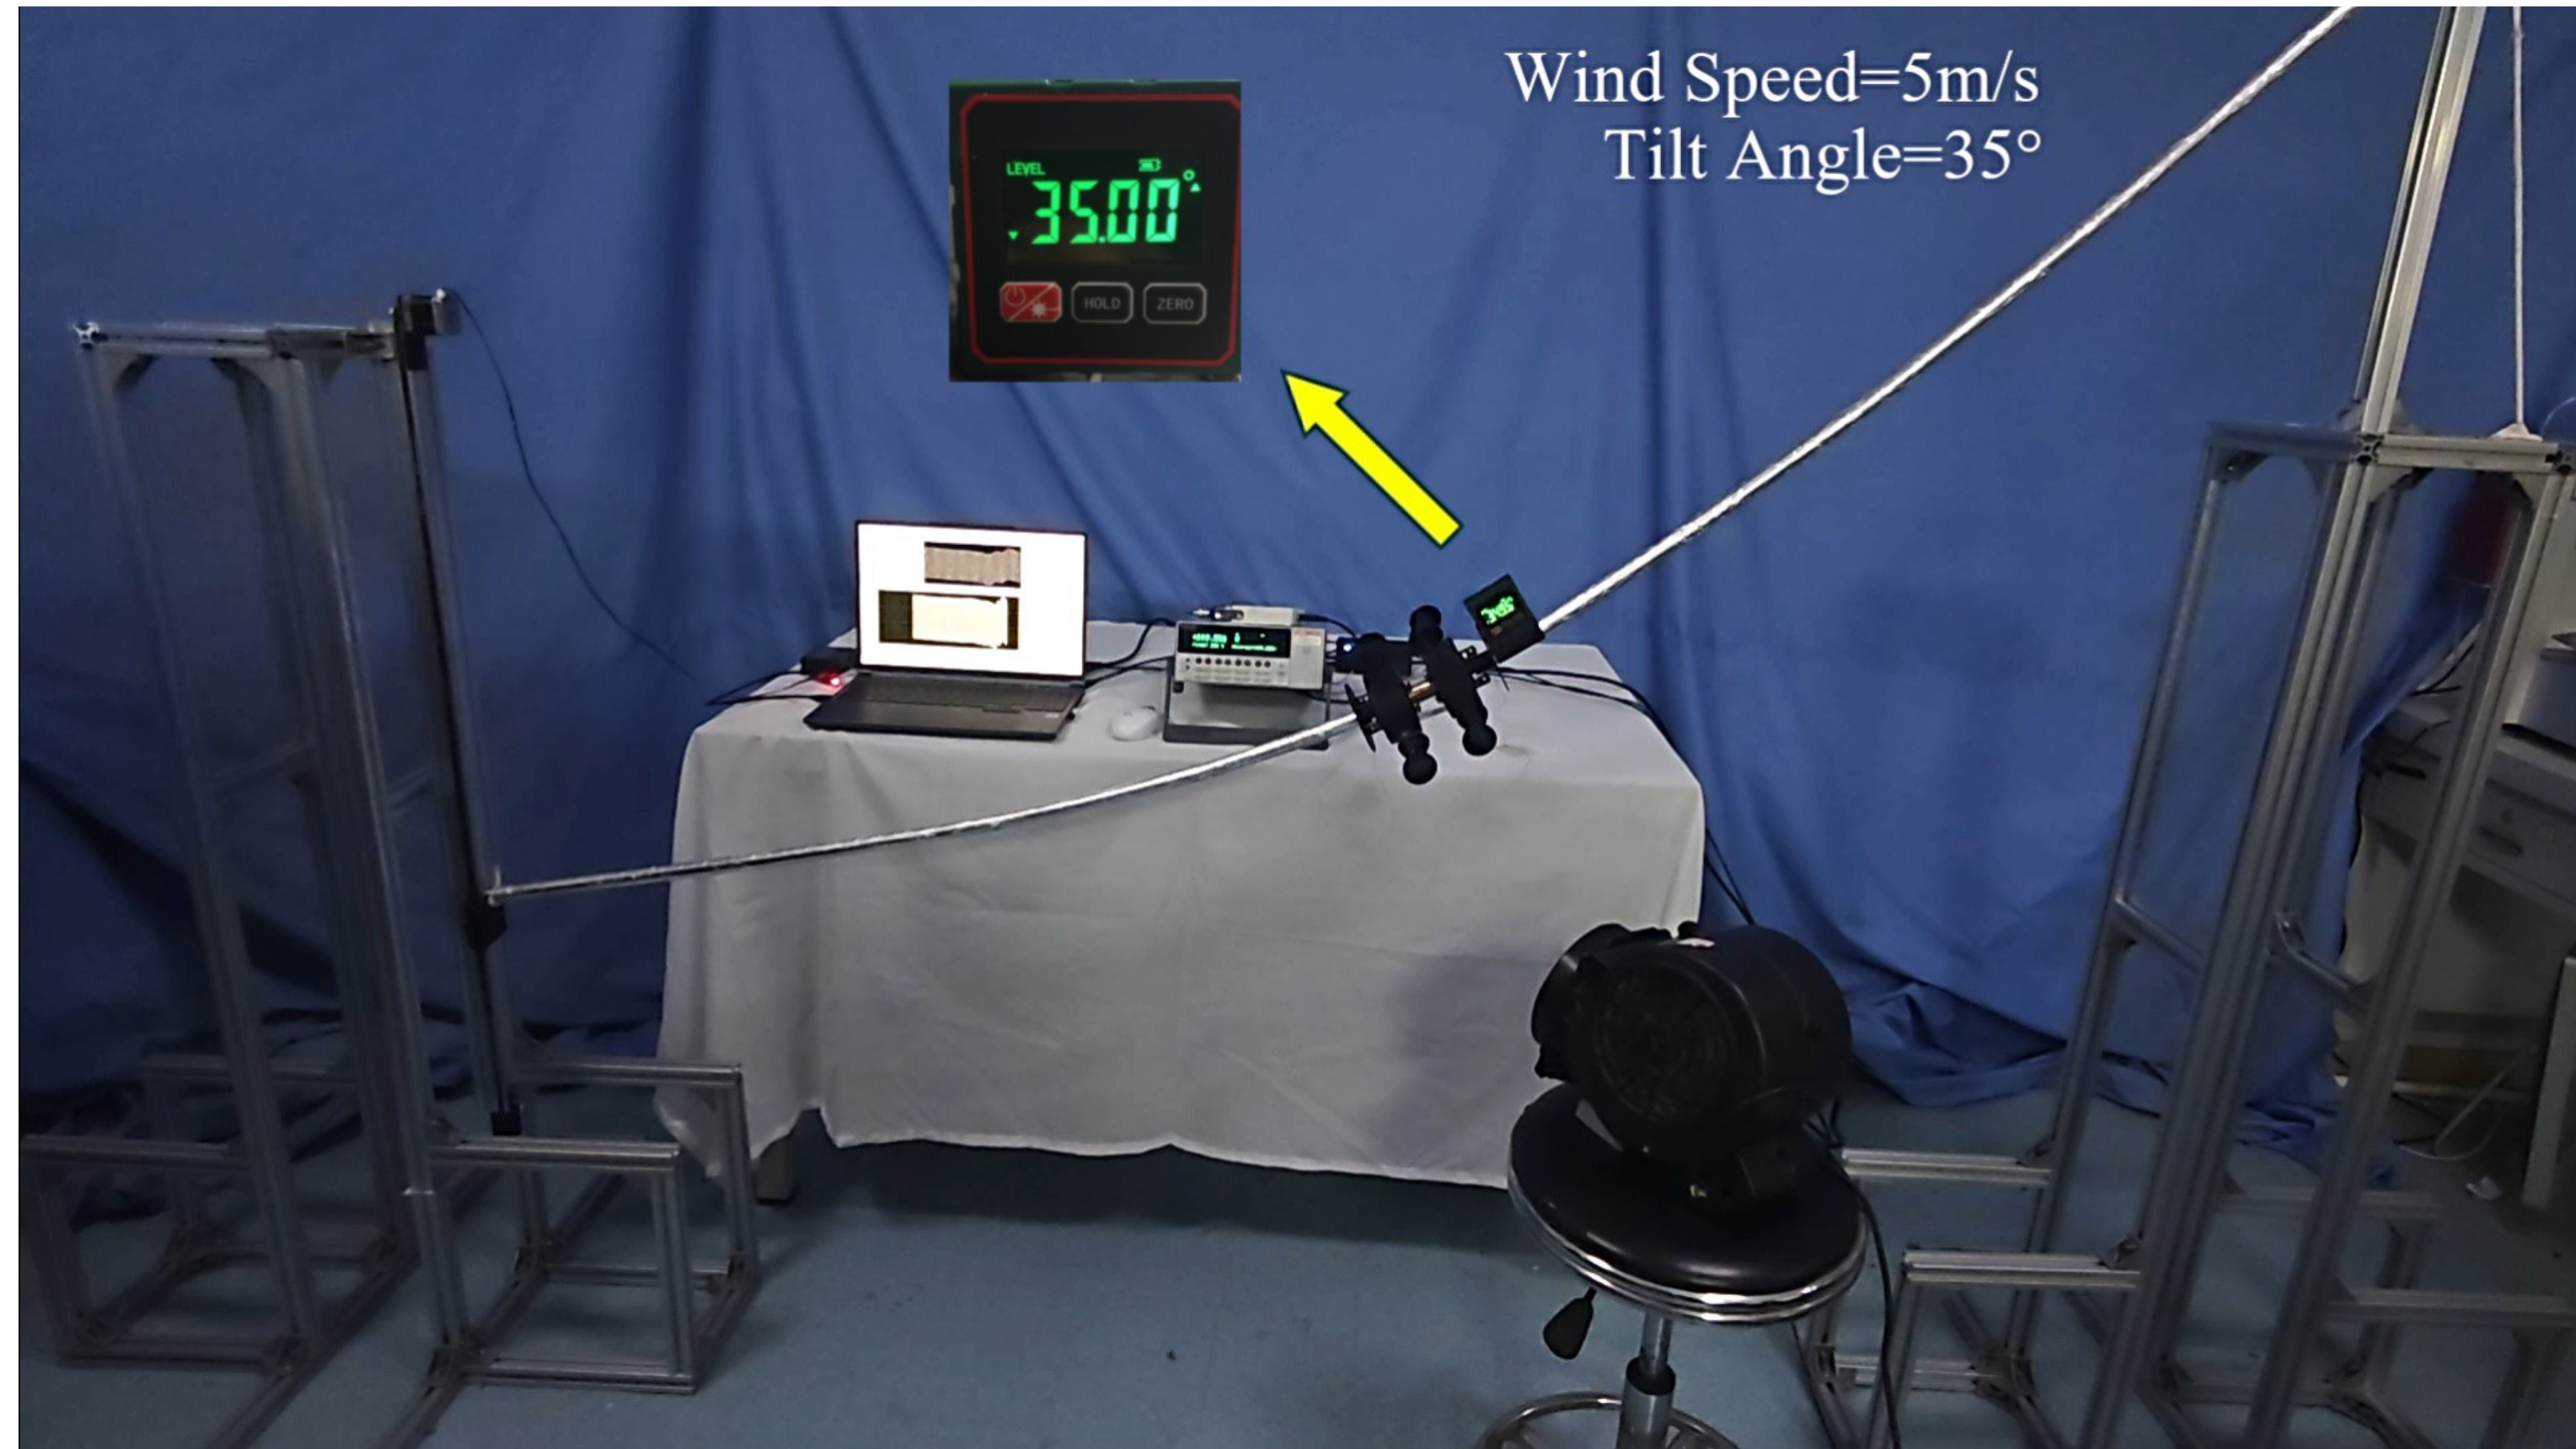

Supplement: d6nr00413j5.pdf [file d6nr00413j5.pdf]

Video playback speed  $\times 3$

Wind Speed=11m/s  
Tilt angle $\approx 30^\circ$

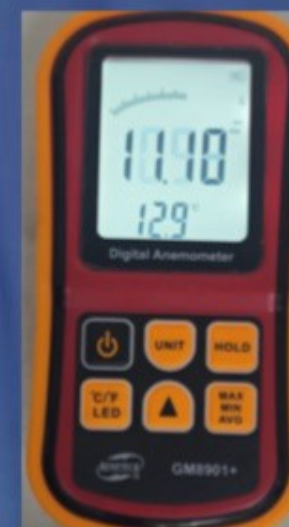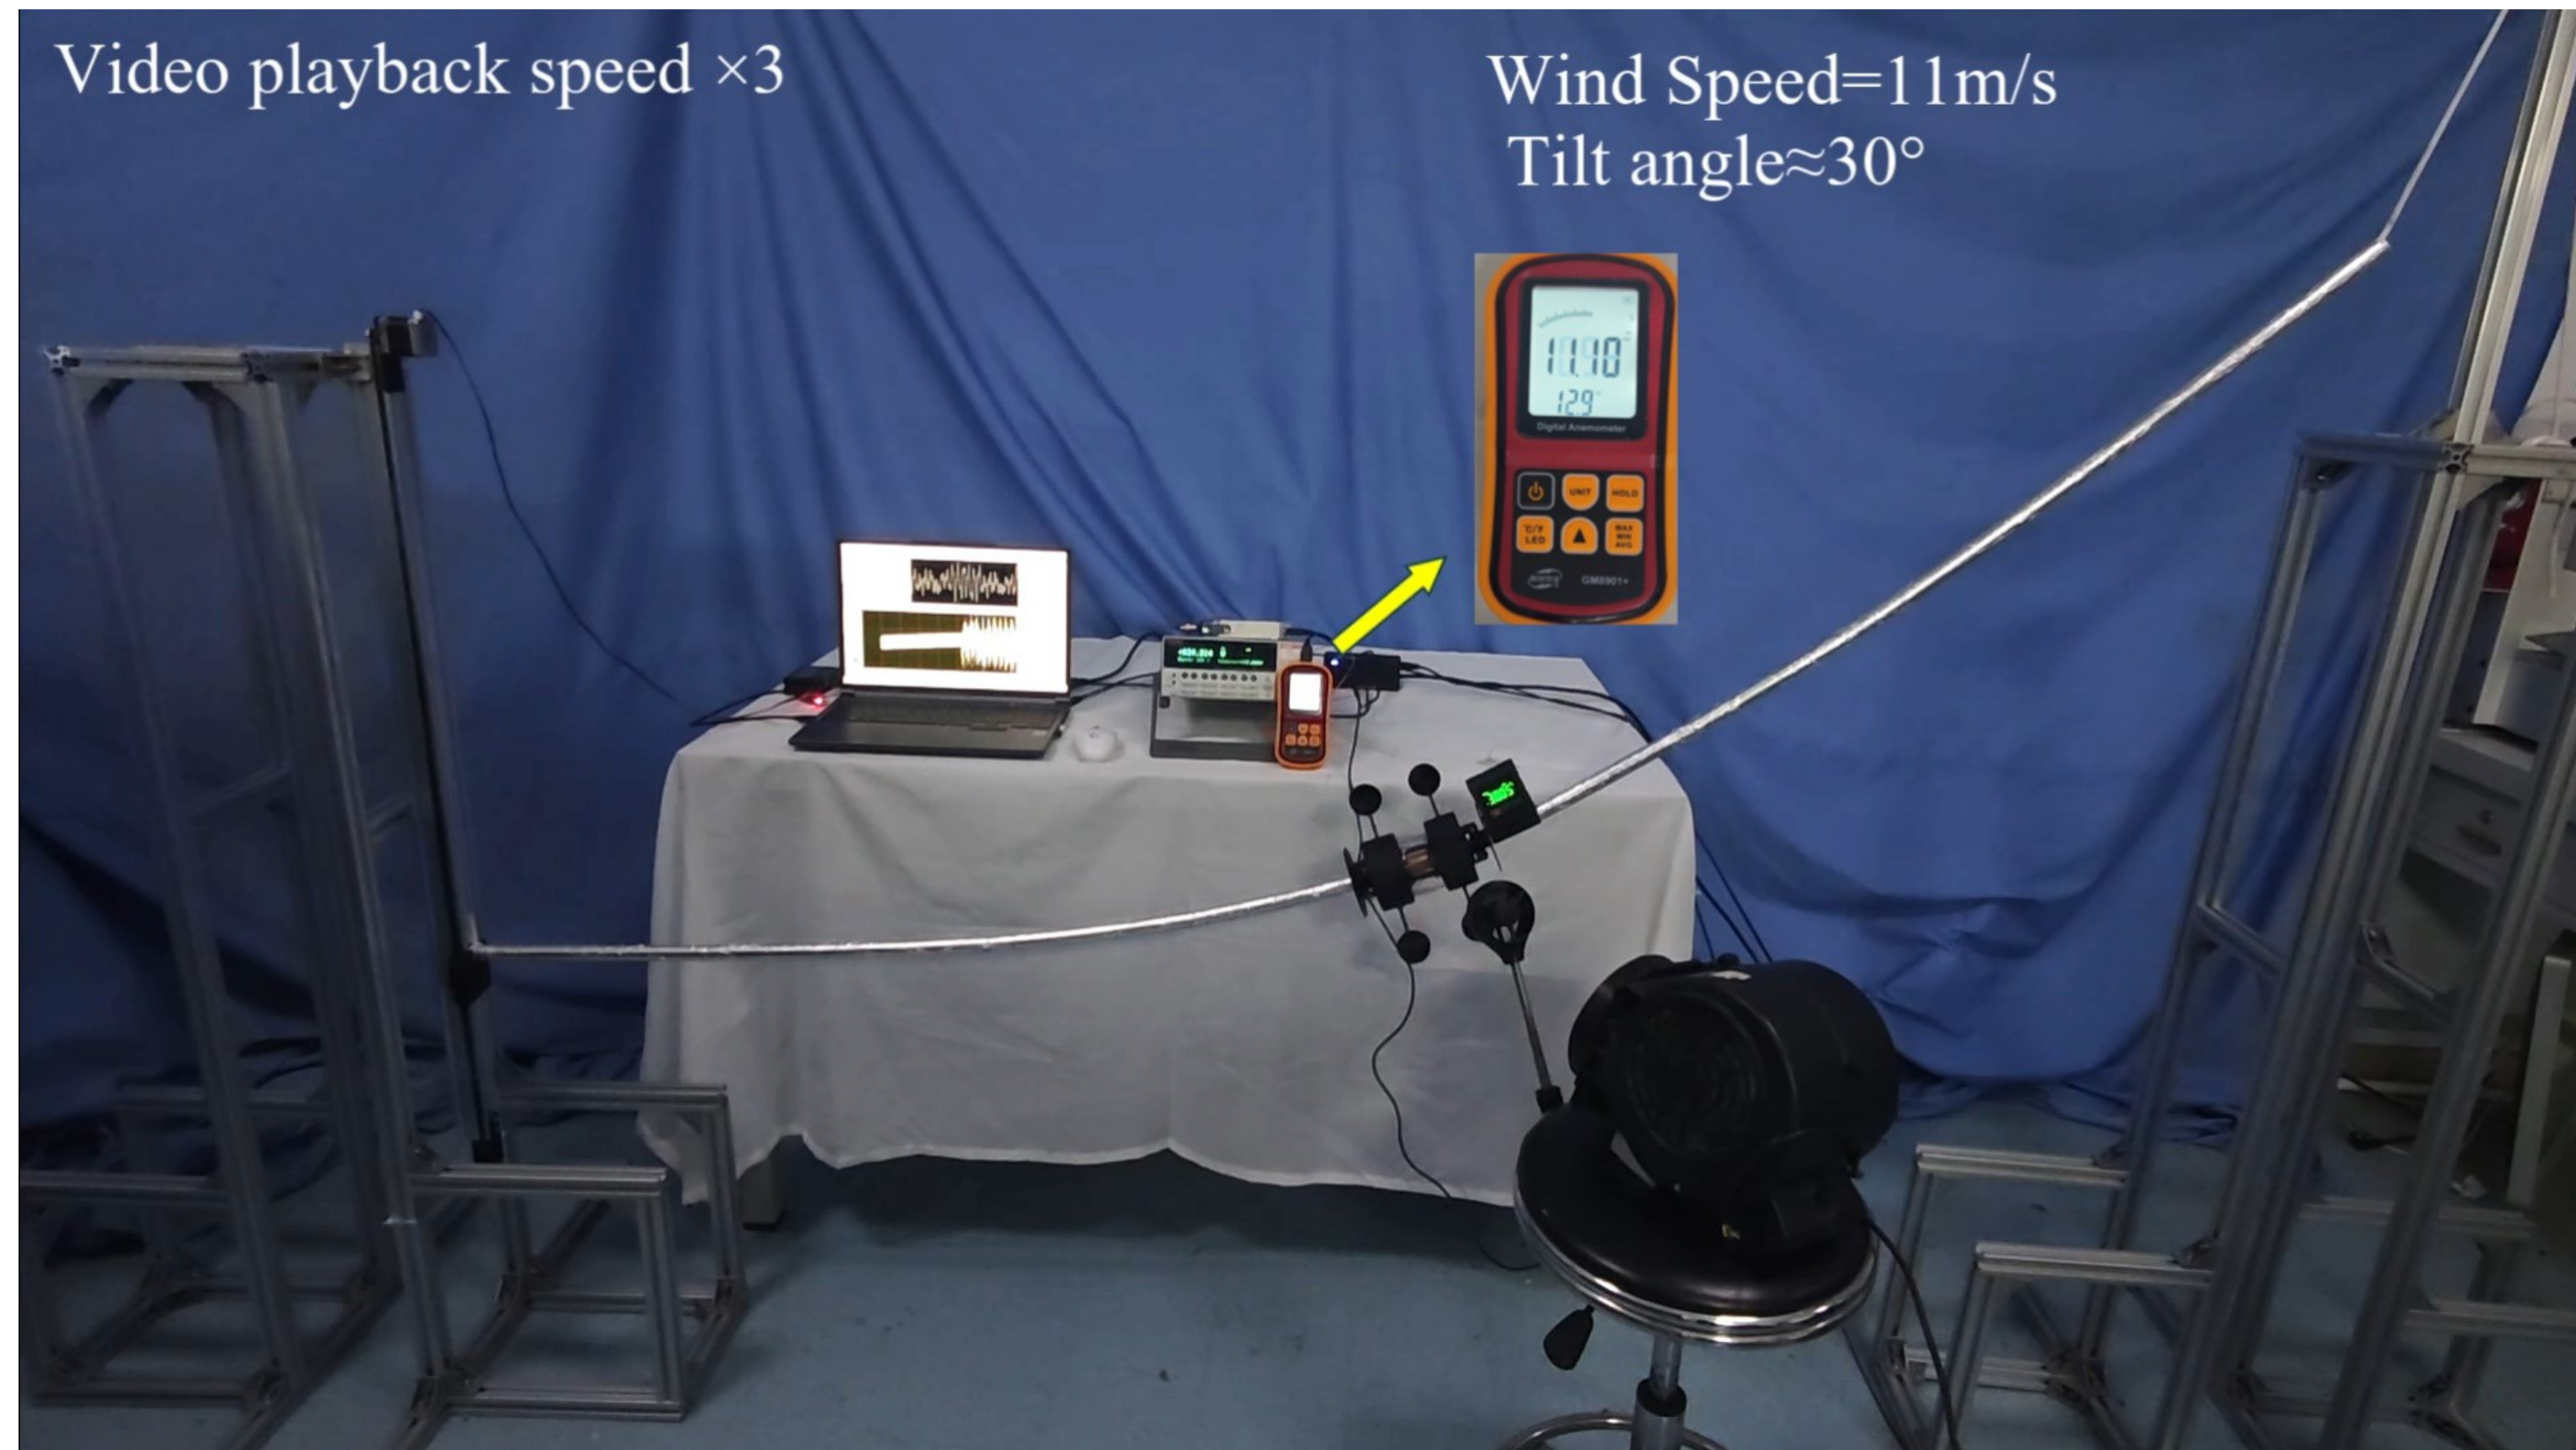

Supplement: d6nr00413j7.pdf [file d6nr00413j7.pdf]
